# Supplementary material
Source: PubMed Central journal article supplement (PMC2799752)
Supplement: 0912484106_0912484106SI.pdf [file 0912484106_0912484106SI.pdf]

# Supporting Information

Mulder et al. 10.1073/pnas.0912484106

## SI Text

1. Paxinos G, Franklin KBJ (2001) *The Mouse Brain in Stereotaxic Coordinates* (Academic, San Diego, CA).
2. Bons N, et al. (1998) A stereotaxic atlas of the grey lesser mouse lemur brain (*Microcebus murinus*). *Brain Res Bull* 46:1–173.
3. Mulder J, et al. (2009) Tissue profiling of the mammalian central nervous system using human antibody-based proteomics. *Mol Cell Proteomics* 8:1612–1622.
4. Wagner L, et al. (2000) Cloning and expression of secretagogin, a novel neuroendocrine- and pancreatic islet of Langerhans-specific  $Ca^{2+}$ -binding protein. *J Biol Chem* 275:24740–24751.
5. Lai M, et al. (2006) Secretagogin, a novel neuroendocrine marker, has a distinct expression pattern from chromogranin A. *Virchows Arch* 449:402–409.
6. Gartner W, et al. (2007) New functional aspects of the neuroendocrine marker secretagogin based on the characterization of its rat homolog. *Am J Physiol Endocrinol Metab* 293:E347–E354.
7. Wyss JM, Sripanidkulchai K (1983) The indusium griseum and anterior hippocampal continuation in the rat. *J Comp Neurol* 219:251–272.
8. Adamek GD, Shipley MT, Sanders MS (1984) The indusium griseum in the mouse: Architecture, Timm's histochemistry and some afferent connections. *Brain Res Bull* 12:657–668.
9. Mody I, Kohr G, Otis TS, Staley KJ (1992) The electrophysiology of dentate gyrus granule cells in whole-cell recordings. *Epilepsy Res Suppl* 7:159–168.
10. Staley KJ, Otis TS, Mody I (1992) Membrane properties of dentate gyrus granule cells: Comparison of sharp microelectrode and whole-cell recordings. *J Neurophysiol* 67:1346–1358.
11. Harkany T, et al. (2003) Complementary distribution of type 1 cannabinoid receptors and vesicular glutamate transporter 3 in basal forebrain suggests input-specific retrograde signalling by cholinergic neurons. *Eur J Neurosci* 18:1979–1992.
12. Riedel A, et al. (2002) Principles of rat subcortical forebrain organization: A study using histological techniques and multiple fluorescence labeling. *J Chem Neuroanat* 23:75–104.
13. Celio MR (1990) Calbindin D-28k and parvalbumin in the rat nervous system. *Neuroscience* 35:375–475.
14. Celio MR, et al. (1988) Monoclonal antibodies directed against the calcium binding protein parvalbumin. *Cell Calcium* 9:81–86.
15. Celio MR, et al. (1990) Monoclonal antibodies directed against the calcium binding protein Calbindin D-28k. *Cell Calcium* 11:599–602.
16. Brumovsky P, Villar MJ, Hokfelt T (2006) Tyrosine hydroxylase is expressed in a sub-population of small dorsal root ganglion neurons in the adult mouse. *Exp Neurol* 200:153–165.
17. Schwaller B, et al. (1993) Characterization of a polyclonal antiserum against the purified human recombinant calcium binding protein calretinin. *Cell Calcium* 14:639–648.
18. Li ZS, Furness JB (1998) Immunohistochemical localisation of cholinergic markers in putative intrinsic primary afferent neurons of the guinea-pig small intestine. *Cell Tissue Res* 294:35–43.
19. Pike CJ, et al. (1993) Neurodegeneration induced by beta-amyloid peptides in vitro: The role of peptide assembly state. *J Neurosci* 13:1676–1687.
20. Martin-Ibanez R, et al. (2006) Vesicular glutamate transporter 3 (VGLUT3) identifies spatially segregated excitatory terminals in the rat substantia nigra. *Eur J Neurosci* 23:1063–1070.
21. Arita DY, Di Marco GS, Schor N, Casarini DE (2002) Purification and characterization of the active form of tyrosine hydroxylase from mesangial cells in culture. *J Cell Biochem* 87:58–64.
22. Bernier PJ, et al. (2002) Newly generated neurons in the amygdala and adjoining cortex of adult primates. *Proc Natl Acad Sci USA* 99:11464–11469.
23. Mullen RJ, Buck CR, Smith AM (1992) NeuN, a neuronal specific nuclear protein in vertebrates. *Development* 116:201–211.
24. Karlsen AE, et al. (1991) Cloning and primary structure of a human islet isoform of glutamic acid decarboxylase from chromosome 10. *Proc Natl Acad Sci USA* 88:8337–8341.
25. Nagatsuka Y, et al. (2003) Carbohydrate-dependent signaling from the phosphatidylinositol-based microdomain induces granulocytic differentiation of HL60 cells. *Proc Natl Acad Sci USA* 100:7454–7459.
26. Mikuni N, Babb TL, Chakravarty DN, Chung CK (1998) Postnatal expressions of non-phosphorylated and phosphorylated neurofilament proteins in the rat hippocampus and the Timm-stained mossy fiber pathway. *Brain Res* 811:1–9.
27. Stanic D, et al. (2008) Peptidergic influences on proliferation, migration, and placement of neural progenitors in the adult mouse forebrain. *Proc Natl Acad Sci USA* 105:3610–3615.

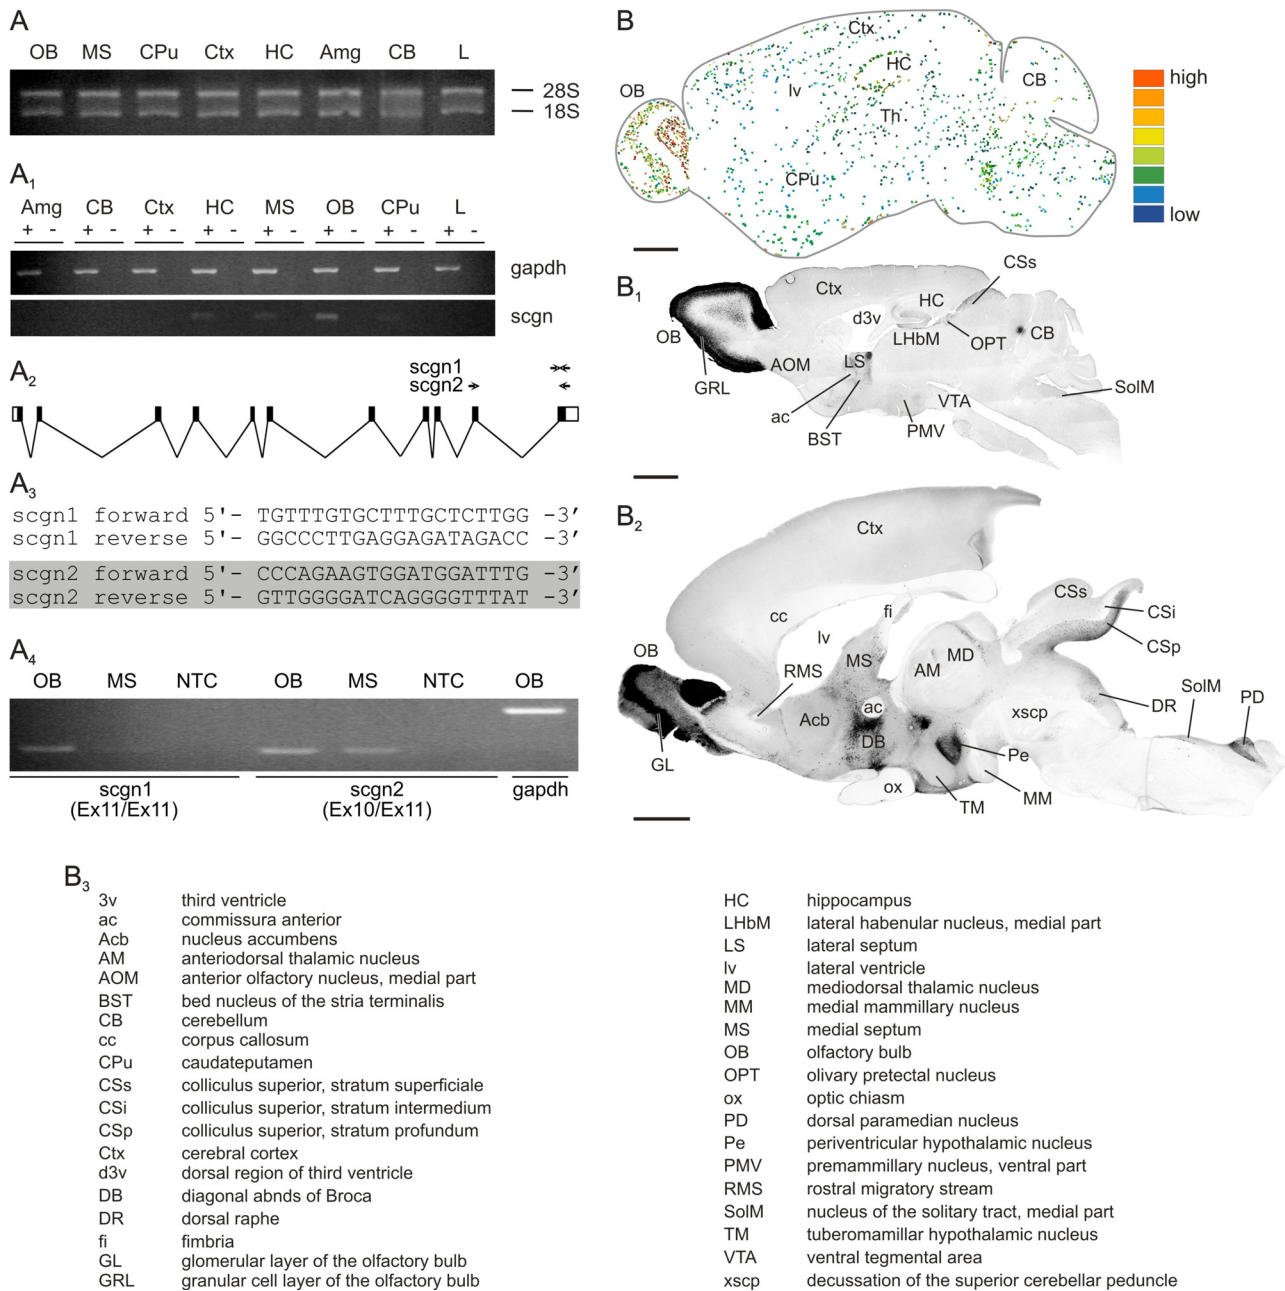

**Fig. S1.** Regional and interspecies differences in scgn expression. (A) Isolation of intact RNA is essential for gene expression profiling. Therefore, we ran an aliquot of total RNA (1  $\mu$ g) isolated from microdissected adult mouse brains (RNeasy Mini kit; Qiagen) on a 1.0% agarose gel with GelGreen (Biotium). Sharp 28S and 18S rRNA bands indicate intact total RNA. Liver tissue (L) was used as negative control (see also Fig. 1A). (A<sub>1</sub>) Real-time qPCRs were validated by preliminary testing of amplification efficacy and by excluding the possibility of genomic DNA contamination in the presence (+) or absence (–) of reverse transcriptase in parallel and running the samples on 1.5% agarose gel. Data for both gapdh, a housekeeping gene used as internal standard, and scgn are shown. (A<sub>2</sub>) Exon (Ex, solid squares)/intron (lines) map of the scgn gene. Open squares indicate 5' and 3' untranslated regions. Arrows indicate the relative position and orientation of primers used to amplify scgn cDNA by qPCR. (A<sub>2</sub> and A<sub>3</sub>) Primer sequences, designed either within Ex11 or in Ex10 (forward) and Ex11 (reverse), used to perform qPCRs. Note that both primer pairs amplify appropriately with primer pair 2 (scgn2, highlighted) providing higher efficacy as demonstrated by an appreciable increase in the amplicon quantity from samples of the olfactory bulb (OB) and medial septum (MS). Data on gapdh is provided as positive control. Abbreviations in A<sub>1</sub>–A<sub>4</sub>: Amg, amygdala; CB, cerebellum; CPu, caudate putamen; Ctx, cerebral cortex; HC, hippocampus; NTC, nontemplate control. (B) scgn in situ hybridization signal from adult mouse brain. A scgn mRNA distribution map available in the Allen brain atlas ([www.brain-map.org](http://www.brain-map.org); image series: 583549) was color coded and modified to optimally visualize olfactory, cortical, and ventral pallidal areas harboring pronounced scgn expression. Colors from blue toward red correspond to increasing scgn expression levels. (B<sub>1</sub> and B<sub>2</sub>) scgn immunoreactivity in sagittal sections of adult mouse (B<sub>1</sub>) and gray mouse lemur (B<sub>2</sub>) brain. (B<sub>3</sub>) List of abbreviations used in B<sub>1</sub> and B<sub>2</sub>. [Scale bars, 1 mm (B and B<sub>1</sub>) and 2.5 mm (B<sub>2</sub>).] Nomenclature for mouse and lemur brains was adopted from Paxinos and Franklin (1) and Bons et al. (2), respectively.

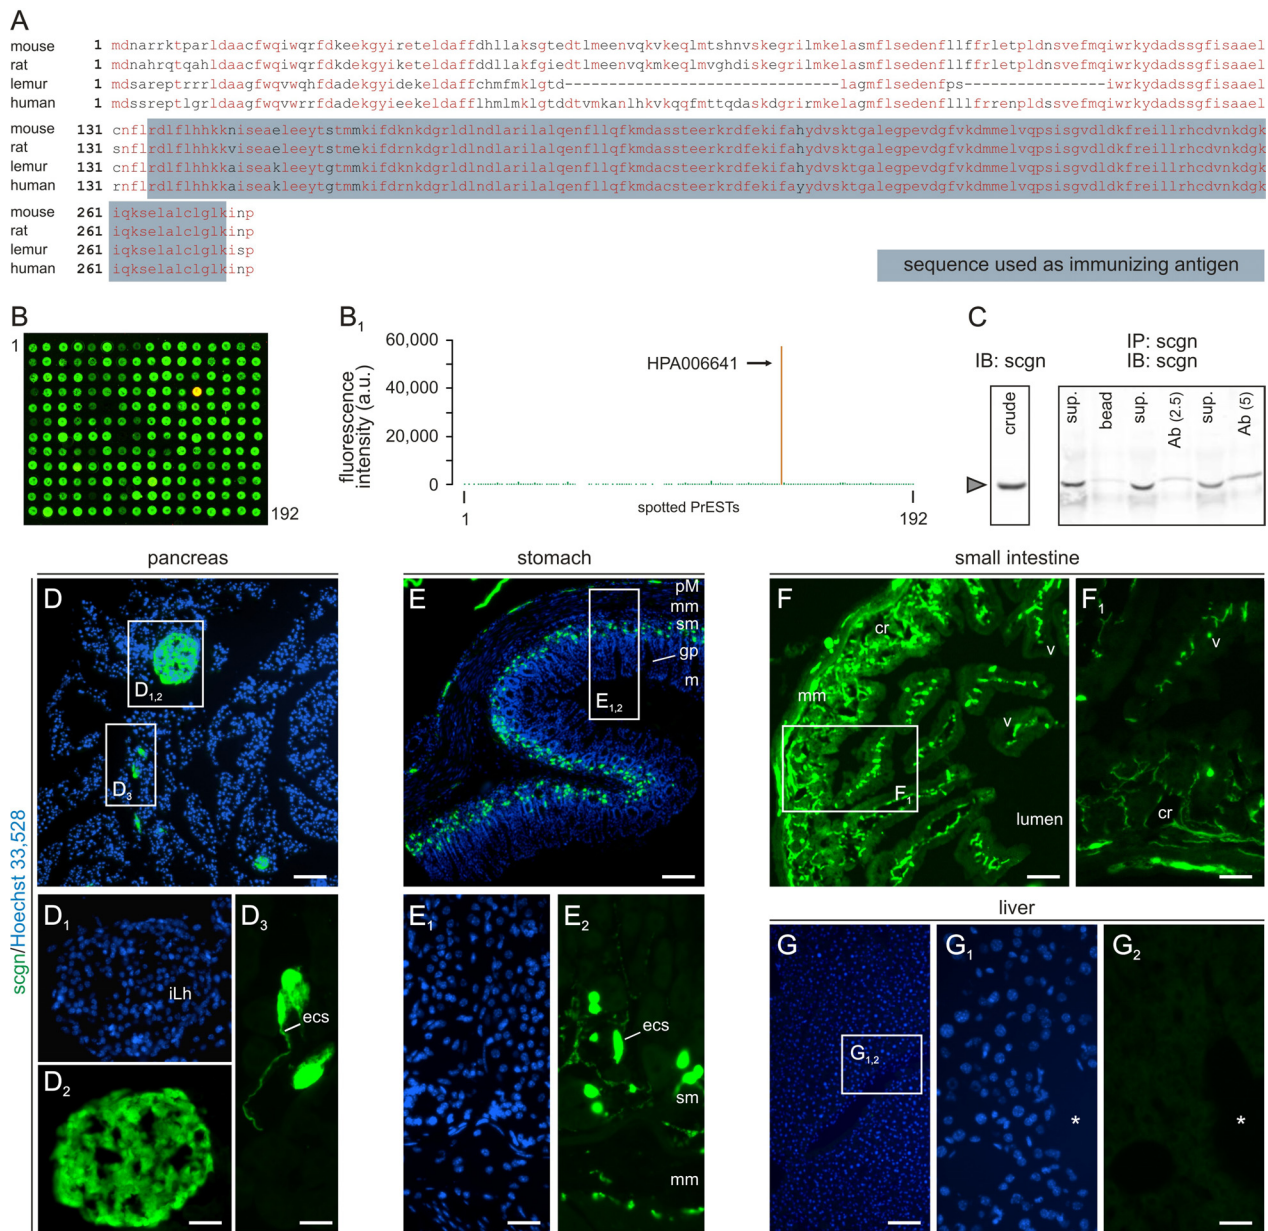

**Fig. S2.** Antibody validation by scgn expression profiling in neuroendocrine cells of peripheral organs. (A) Partial amino acid (aa) sequence alignment of mouse, rat, lemur, and human scgn. Phylogenetically conserved aa residues are shown in red. Gray box indicates a C-terminal sequence used to generate antibodies with high homology across mammals (mouse, 96%; rat, 96%; gray mouse lemur, 99%; as compared to human). (B and B<sub>1</sub>) Protein array containing 192 protein epitope signature tags (PrESTs) were used for initial screening of antibody specificity. Note that the anti-scgn antibody used in the present study (HPA006641) selectively recognizes its cognate PrEST, while no binding to other peptide fragments present in this protein microarray was detected (3). (C) We have further tested the specificity of our antibody by performing immunoprecipitation (IP) experiments. Western blot analysis (IB) of tissue lysates from adult mouse OB revealed a single immunoreactive band at the predicted molecular weight of scgn. We then performed IP without primary antibody (bead) and with incrementing primary antibody concentrations (Ab = 2.5 or 5.0  $\mu$ L), while keeping the concentration of GammaBind G Sepharose beads (GE Healthcare) used to precipitate the primary Ab constant. Subsequently, membranes were reprobed with scgn primary Ab. Incrementing primary Ab concentrations in IP experiments led to a proportional increase in enriched scgn and, conversely, to a gradual scgn depletion of remnant supernatants (sup.) of whole cell lysates subjected to analysis. These data support that the polyclonal anti-scgn antibody used throughout this report recognizes a single target molecule. (D–G<sub>2</sub>) scgn has recently been cloned from neuroendocrine organs with highest expression in  $\beta$  cells of the pancreatic islets of Langerhans (iLh) (4) and neuroendocrine cells of other organ systems including the gastrointestinal tract (5, 6). Therefore, we have further validated our anti-scgn antibody by means of high-resolution histochemistry on 16- $\mu$ m thick cryostat sections of the mouse pancreas (D–D<sub>2</sub>), stomach (E–E<sub>3</sub>), and small intestine (F and F<sub>1</sub>). Liver tissue, lacking appreciable scgn expression (Fig. 1A), served as negative control (G–G<sub>2</sub>). In the pancreas, scgn immunoreactivity revealed  $\beta$  cells of iLh (D–D<sub>2</sub>) and small clusters of putative endocrine cells (ecs) with often long processes (D<sub>3</sub>). (E–E<sub>2</sub>) In the stomach, scgn immunoreactivity localized in often elongated cells in gastric glands at the base of gastric pits (gp), likely enteroendocrine cells (ecs), and in cells of the plexus of Meissner (pM). (F and F<sub>1</sub>) Similarly, in the small intestine scgn immunoreactivity is seen in several layers entering cells lining the crypts (cr) and the muscularis mucosa (mm). Hoechst 35,528, a nuclear dye, has been applied to reveal tissue architecture. Asterisks in G<sub>1</sub> and G<sub>2</sub> mark blood vessel. m, mucosa; sm, submucosa; v, villi. [Scale bars, 10  $\mu$ m (D<sub>3</sub>), 30  $\mu$ m (D<sub>2</sub>, E<sub>1</sub>, F<sub>1</sub>, and G<sub>2</sub>), and 120  $\mu$ m (D–G).]



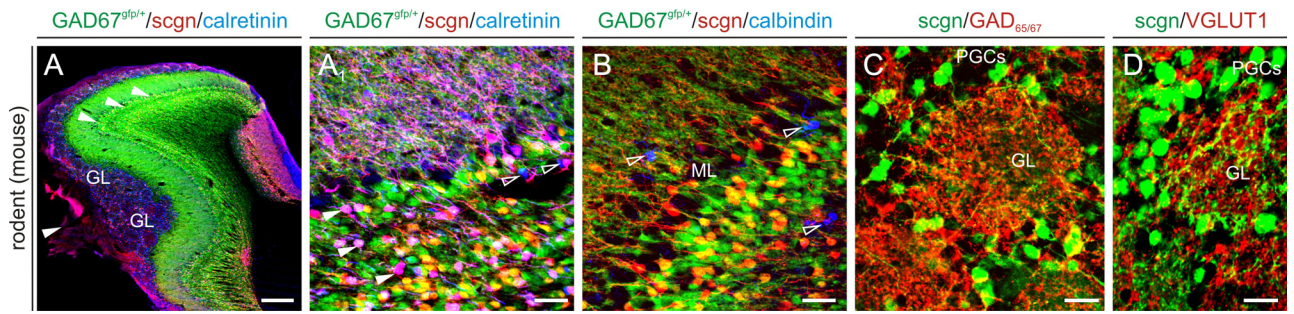

**Fig. 54.** Identity and synaptic afferents of scgn-expressing neurons in the olfactory bulb of GAD67<sup>gfp/+</sup> mice. GAD67-GFP ( $\Delta$ neo) mice (GAD67<sup>gfp/+</sup> mice) were used to explore whether scgn is present in GAD67-expressing neurons. (A) GFP signal concentrated in the granule, mitral, and plexiform layers of the OB with a sharp decrease, but not disappearance (see also Fig. 2 *D*<sub>2</sub> and *D*<sub>3</sub>), in GFP fluorescence in the glomerular layer (GL). Solid arrows indicate the general position of *A*<sub>1</sub> and *B*. scgn frequently coexists with calretinin in *gfp*<sup>+</sup> neurons (*A*<sub>1</sub>, solid arrowheads) but is excluded from calbindin D28k<sup>+</sup>/*gfp*<sup>-</sup> Blanes cells (*B*, open arrowheads) in the granular and mitral layers (ML) of the OB. The somatodendritic axis of scgn<sup>+</sup> periglomerular cells (PGCs) receives both inhibitory (GAD<sub>65/67</sub><sup>+</sup>, *C*) and excitatory (VGLUT1<sup>+</sup>, *D*) afferents. [Scale bars, 25  $\mu$ m (*A*<sub>1</sub>–*D*) and 250  $\mu$ m (*A*).]

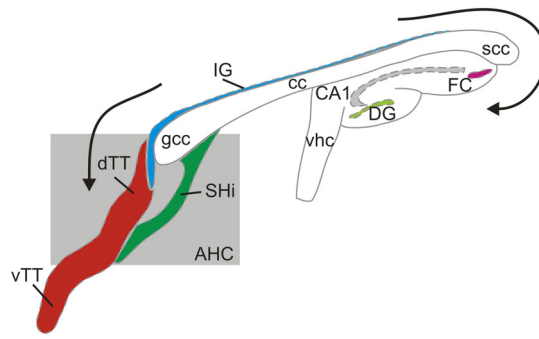

**Fig. S5.** Topographic organization and spatial relationships of limbic areas containing scgn-expressing granule cells. The dorsal and ventral tenia tecta (d/vTT) form the anterior extremity of a continuum of nuclei containing, among other cell types, neurochemically and cytoarchitecturally similar granule cell-like neurons (7, 8). The vTT is differentiated from the dTT territory by substantial differences in its cell type composition (7). The dTT and its posterior continuation, the septohippocampal nucleus (SHi), show clearly laminated structures with a comprehensive layer of granule cells and thus are cumulatively referred to as the AHC (7). Rostrally, the dTT extends in a mediadorsal direction through a curvature around the genu of corpus callosum (gcc) and its cell mass transits into the IG. The IG is a thin longitudinal supracallosal nucleus extending up until the caudal extremity of the corpus callosum where it folds around the splenium of the corpus callosum (scc) to form the fasciola cinerium (FC) and DG. Arrows indicate major fold directions along the longitudinal axis of the mouse brain. Gray box indicates the general location of cell groups cumulatively classified as AHC (7). CA1, subfield CA1 of the hippocampus; vhc, ventral hippocampal commissure.



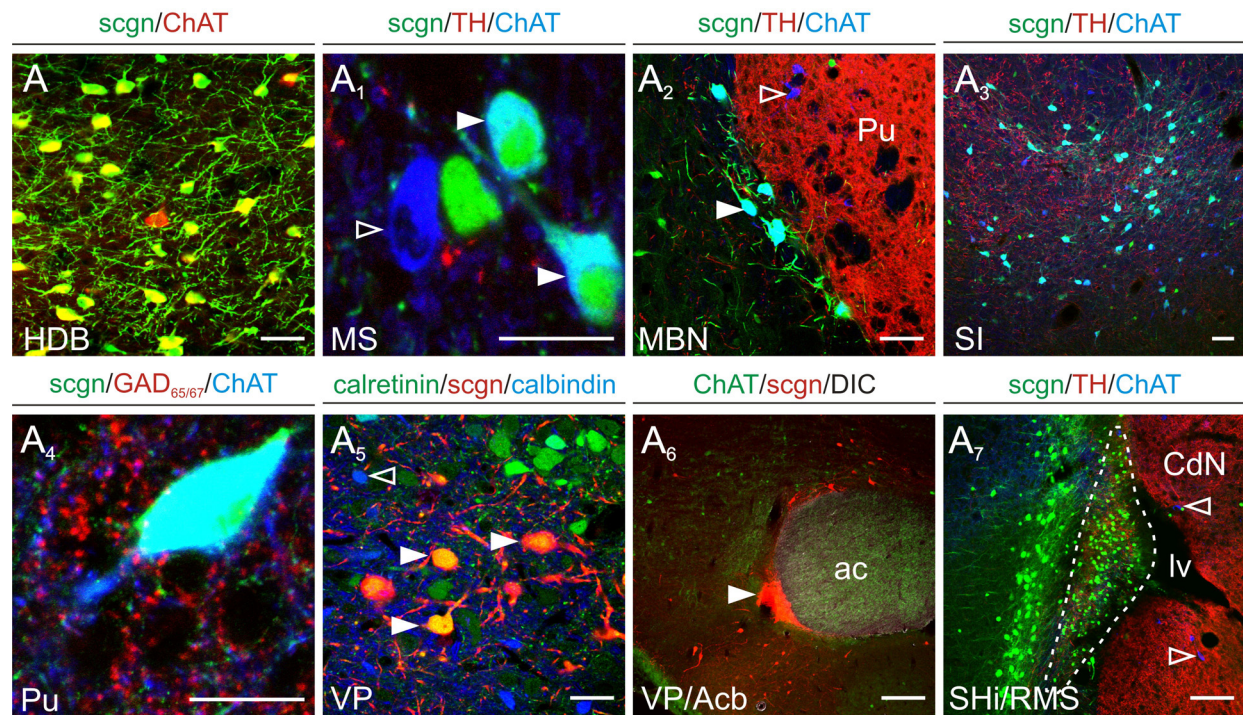

**Fig. S7.** Scgn expression in basal forebrain territories of the gray mouse lemur. (A) Choline-acetyltransferase (ChAT)<sup>+</sup> projection neurons of the primate basal forebrain complex, including the horizontal diagonal band of Broca (HDB), express scgn. (A<sub>1</sub>) While the majority of cholinergic neurons coexpress ChAT and scgn (solid arrowheads), a proportion (<5%) of cholinergic cells in the medial septum (MS) lack this CBP (open arrowhead). (A<sub>2</sub>) Similarly, scgn coexists in cholinergic projection neurons (solid arrowhead) of the magnocellular basal nucleus (MBN). However, scgn is heterogeneously expressed in cholinergic interneurons (open arrowhead)—see also A<sub>4</sub> otherwise—in the nucleus putamen (Pu). (A<sub>3</sub>) The dorsomedial substantia innominata contains large scgn<sup>+</sup>/ChAT<sup>+</sup> cholinergic neurons, whereas single labeled scgn<sup>+</sup> or ChAT<sup>+</sup> cells reside in the laterobasal segment of this area. (A<sub>5</sub>) scgn<sup>+</sup> neurons coexpress CR (solid arrowheads) but not CB (open arrowhead) in the ventral pallidum (VP). (A<sub>6</sub>) Robust scgn immunoreactivity concentrates in the nucleus accumbens (Acb), while a more homogenous distribution of scgn<sup>+</sup> neurons is apparent in VP territories. (A<sub>7</sub>) scgn is largely absent from cholinergic interneurons (open arrowheads) in the nucleus caudatus (CdN). Note scgn immunoreactivity in the septohippocampal nucleus (SHi) and in rostrally migrating neuroblasts. Dashed line encircles the RMS. ac, anterior commissure; GAD<sub>65/67</sub>, glutamic acid decarboxylase 65/67 kDa isoforms; TH, tyrosine hydroxylase. [Scale bars, 20 μm (A<sub>3</sub>), 35 μm (A<sub>1</sub> and A<sub>5</sub>), 60 μm (A, A<sub>2</sub>, and A<sub>4</sub>), and 100 μm (A<sub>6</sub> and A<sub>7</sub>).]

## Other Supporting Information Files

[Table S1 \(PDF\)](#)

[Table S2 \(PDF\)](#)

[Table S3 \(PDF\)](#)
