# Supplementary material
Source: PubMed Central journal article supplement (PMC2799752)
Supplement: 0912484106_ST1_PDF.pdf [file 0912484106_ST1_PDF.pdf]

Table S1. Nomenclature of brain regions and their list of abbreviations used in this report

|       |                                                                      |
|-------|----------------------------------------------------------------------|
| Gi    | gigantocellular reticular nucleus                                    |
| Pn    | pontine nucleus                                                      |
| PnC   | pontine reticular nucleus, caudal part                               |
| PnV   | pontine reticular nucleus, ventral part                              |
| RMg   | raphe magnus nucleus                                                 |
| RPa   | raphe pallidus nucleus                                               |
| Tz    | nucleus of the trapezoid body                                        |
| RMC   | red nucleus. magnocellular part                                      |
| 2CB   | 2nd cerebellar lobe                                                  |
| CB    | cerebellum                                                           |
| CA    | CA1-3 hippocampal subfield                                           |
| Ctx   | cerebral cortex                                                      |
| Acb   | accumbens nucleus                                                    |
| ACo   | anterior cortical amygdaloid nucleus                                 |
| AD    | anterodorsal thalamic nucleus                                        |
| APT   | anterior pretectal nucleus                                           |
| Arc   | arcuate hypothalamic nucleus                                         |
| AHi   | amygdalohippocampal area                                             |
| AHC   | anterior hippocampal continuation                                    |
| BL    | basolateral amygdaloid nucleus                                       |
| BST   | bed nucleus of the stria terminalis                                  |
| CdN   | caudate nucleus                                                      |
| CeC   | central amygdala, capsular part                                      |
| CeM   | central amygdala, medial division                                    |
| CM    | central medial thalamic nucleus                                      |
| CPu   | caudate putamen                                                      |
| DEn   | dorsal endopiriform nucleus                                          |
| DG    | dentate gyrus                                                        |
| DLG   | dorsal lateral geniculate nucleus                                    |
| DM    | dorsal hypothalamic nucleus                                          |
| DS    | dorsal septal nucleus                                                |
| d/vTT | dorsal/ventral tenia tecta                                           |
| FC    | fasciola cinereum                                                    |
| flc   | fissure longitudinalis cerebri                                       |
| g     | dentate granule cell layer                                           |
| GP    | globus pallidus                                                      |
| HC    | hippocampus                                                          |
| HDB   | nucleus of the horizontal limb of the diagonal band                  |
| IG    | indusium griseum                                                     |
| IPAC  | intersitial nucleus of the posterior limb of the anterior commissure |
| La    | lateral amygdaloid nucleus                                           |
| LD    | laterodorsal thalamic nucleus                                        |
| LPM   | lateral posterior thalamic nucleus                                   |
| LS    | lateral septal nucleus                                               |
| m     | dentate molecular layer                                              |
| MBN   | magnocellular basal nucleus (of Meynert)                             |
| MD    | mediodorsal thalamic nucleus                                         |
| MeA   | medial amygdaloid nucleus                                            |
| MG    | medial geniculate nucleus                                            |
| MPA   | medial preoptic area                                                 |
| MS    | medial septal nucleus                                                |
| Pe    | periventricular hypothalamic nucleus                                 |
| Pir   | piriform cortex                                                      |
| Pu    | nucleus putamen                                                      |
| PV    | paraventricular thalamic nucleus                                     |
| PVH   | paraventricular hypothalamic nucleus                                 |
| pyr   | CA1-3 pyramidal cell layer                                           |
| Rt    | reticular thalamic nucleus                                           |
| S     | subiculum                                                            |

|         |                                                         |
|---------|---------------------------------------------------------|
| SHi     | septohippocampal nucleus                                |
| SON     | supraoptic nucleus                                      |
| VA      | ventral anterior thalamic nucleus                       |
| VEEn    | ventral endopiriform nucleus                            |
| VL      | ventrolateral thalamic nucleus                          |
| VLG     | ventral lateral geniculate nucleus                      |
| VP      | ventral pallidum                                        |
| VPL     | ventral posterolateral thalamic nucleus                 |
| CnF     | cuneiform nucleus                                       |
| DR      | dorsal Raphe nucleus                                    |
| ECIC    | external cortex of the inferior colliculus              |
| IP      | interpeduncular nucleus                                 |
| LC      | locus coeruleus                                         |
| LPB     | lateral parabrachial nucleus                            |
| MnR     | median Raphe nucleus                                    |
| MPB     | medial parabrachial nucleus                             |
| MT      | medial terminal nucleus of the accessory optic tract    |
| PAG     | periaqueductal grey                                     |
| SC      | superior colliculus                                     |
| SNC     | substantia nigra, compact part                          |
| SNR     | substantia nigra, reticular part                        |
| 7n      | facial nerve                                            |
| 8vn     | vestibulocochlear nerve                                 |
| ac      | anterior commissure                                     |
| cc      | corpus callosum                                         |
| cic     | commissure of the inferior colliculus                   |
| cp      | cerebral peduncle                                       |
| f       | fornix                                                  |
| fi      | fimbria of the hippocampus                              |
| gcc     | genu of corpus callosum                                 |
| ic      | internal capsule                                        |
| ml      | medial lemniscus                                        |
| mlf     | medial longitudinal fasciculus                          |
| mt      | mammillothalamic tract                                  |
| opt     | optic tract                                             |
| ox      | optic chiasm                                            |
| py      | pyramidal tract                                         |
| s5      | sensory root of the trigeminal nucleus                  |
| Scc     | splenium of corpus callosum                             |
| scp     | superior cerebellar peduncle                            |
| sp5     | spinal trigeminal tract                                 |
| vhc     | ventral hippocampal commissure                          |
| xscp    | decussation of the superior cerebellar peduncle         |
| E/OV    | ependymal and subependymal layer/olfactory ventricle    |
| EPL/IPL | External/internal plexiform layer of the olfactory bulb |
| GL      | glomerular layer of the olfactory bulb                  |
| GRL     | granule cell layer of the olfactory bulb                |
| ML      | mitral cell layer of the olfactory bulb                 |
| RMS     | rostral migratory stream                                |

Areas within the brainstem (orange), cerebellum (black), telencephalon (green), midbrain (magenta), nerves and axonal tracts (red), and olfactory bulb (blue) were listed in alphabetical order. We have applied the nomenclature of Paxinos and Franklin (1) and Bons et al. (2) to describe neural structures in mouse and grey mouse lemur brain, respectively.
