# Supplementary material
Source: PubMed Central journal article supplement (PMC2799752)
Supplement: 0912484106_ST2_PDF.pdf [file 0912484106_ST2_PDF.pdf]

Table S2. Comprehensive list of brain regions containing secretagogin-immunoreactive neuronal structures in mouse and grey mouse lemur brains

|                                                     | Mouse      | Grey mouse lemur |
|-----------------------------------------------------|------------|------------------|
| accumbens nucleus                                   | ●● / ++    | ●● / +++         |
| anterior cortical amygdaloid nucleus                | ● / -      | ● / +            |
| arcuate hypothalamic nucleus                        | ●●● / +++  | - / +            |
| basal nucleus (Meynert)                             | - / +      | ●●● / +          |
| basolateral amygdaloid nucleus                      | - / -      | - / -            |
| bed nucleus of the stria terminalis                 | ●●●● / ++  | ●●● / +++        |
| caudate nucleus (lemur)                             | n.a.       | ● / -            |
| caudate putamen (mouse)                             | ● / -      | n.a.             |
| central amygdala                                    | ●●● / ++   | - / +            |
| cortex                                              | ● / -      | ●● / ±           |
| dentate gyrus                                       | ●● / +     | ●● / -           |
| dorsal hypothalamic nucleus                         | ●● / +     | ●● / ++          |
| dorsal lateral geniculate nucleus                   | ●● / ++    | - / -            |
| dorsal tegmental area                               | ●●● / +++  | ●●● / +++        |
| dorsal thalamic area                                | ● / +      | ● / +            |
| external plexiform layer of the olfactory bulb      | ●● / +++   | ● / ++           |
| globus pallidus                                     | - / -      | - / +            |
| glomerular layer of the olfactory bulb              | ●●●● / +++ | ●●●● / +++       |
| granule cell layer of the olfactory bulb            | ●●●●● / ++ | ●●●●● / ++       |
| hippocampus                                         | ● / ±      | ● / -            |
| indusium griseum                                    | ●●●● / +++ | ●●● / -          |
| lateral amygdaloid nucleus                          | - / -      | - / -            |
| lateral hypothalamic area                           | - / +      | - / ++           |
| lateral septal nucleus                              | ● / ++     | ●● / +           |
| locus coeruleus                                     | ● / +      | ● / +            |
| medial preoptic area                                | ●● / ++    | ●● / +           |
| medial septal nucleus                               | - / -      | ●●● / ++         |
| median eminence                                     | - / +++    | - / +++          |
| mediodorsal thalamic nucleus                        | - / +      | - / +            |
| mitral cell layer of the olfactory bulb             | - / ++     | - / ++           |
| nucleus of the horizontal limb of the diagonal band | - / +      | ●●● / ++         |
| nucleus of the solitary tract, medial part          | ●● / ++    | ●● / +           |
| olivary pretectal nucleus                           | ● / +      | ●● / ++          |
| paraventricular hypothalamic nucleus                | ●●● / +++  | ●●● / +++        |
| paraventricular thalamic nucleus                    | - / ++     | ●● / +           |
| periaqueductal grey                                 | ●● / ++    | ●● / ++          |
| periventricular hypothalamic nucleus                | ●●● / ++   | ●●● / +++        |
| putamen (lemur)                                     | n.a.       | ●● / -           |
| rostral migratory stream                            | - / -      | ●● / +           |
| septohippocampal nucleus                            | ●●● / +++  | ●● / +           |
| subiculum                                           | ●● / +++   | ●● / ±           |

|                                    |           |          |
|------------------------------------|-----------|----------|
| substantia nigra, compact part     | - / -     | - / +    |
| substantia nigra, reticular part   | - / -     | - / -    |
| superior colliculus                | ●●●● / ++ | ● / +    |
| supraoptic nucleus                 | ●●● / +   | ●●● / ++ |
| ventral lateral geniculate nucleus | ●●● / ++  | - / -    |
| ventral pallidum                   | ●● / +++  | / +      |

---

The density of secretagogin (scgn)<sup>+</sup> neurons (●) and processes (+), primarily axons, was assessed semi-quantitatively on a scale representing: lack (-), infrequent (●), moderate (●●) or dense (●●●) conglomerates of scgn<sup>+</sup> neurons; or lack (-), sparse (+), moderately (++), prominent (+++) meshwork of scgn<sup>+</sup> neurites. The absence of particular brain areas in either species is indicated by n.a.
