# Supplementary material
Source: PubMed Central journal article supplement (PMC2799752)
Supplement: 0912484106_ST3_PDF.pdf [file 0912484106_ST3_PDF.pdf]

Table S3. List of markers used for multiple immunofluorescence labeling

| <b>Protein target</b>                             | <b>Species</b> | <b>Dilution</b>   | <b>Source</b>           | <b>Fluorophore</b> | <b>Reference</b> |
|---------------------------------------------------|----------------|-------------------|-------------------------|--------------------|------------------|
| Calcitonin gene-related peptide (CGRP)            | guinea pig     | 1:1,000           | Peninsula/Bachem        | Cy2                | 16               |
| Calbindin D28k                                    | mouse IgG      | 1:1,000 - 1:2,000 | Swant                   | Cy5                | 13,15            |
| Calretinin                                        | goat           | 1:1,000           | Swant                   | Cy2                | 17               |
| Cannabinoid receptor, type 1 (C-terminal)         | guinea pig     | 1:1,000           | K. Mackie               | Cy2                | This report      |
| Choline acetyltransferase                         | goat           | 1:200 - 1:250     | Chemicon/Millipore      | Cy5                | 18               |
| Doublecortin                                      | goat           | 1:100             | Santa-Cruz              | Cy3                | 25,27            |
| Glutamic acid decarboxylase 65/67 kDa isoforms    | mouse IgG      | 1:1,000           | Nordic BioSite          | Cy3                | 24               |
| Neuronal nuclei; clone A60 (NeuN)                 | mouse IgG      | 1:400             | Chemicon/Millipore      | Cy5                | 23               |
| Non-phosphorylated 200 kDa neurofilament (SMI-32) | mouse IgG      | 1:1,000           | Sternberger Monoclonals | Cy2                | 19,26            |
| Parvalbumin, clone 235                            | mouse IgG      | 1:2,000           | Swant                   | Cy2                | 13,14            |
| Parvalbumin                                       | goat           | 1:1,000           | Swant                   | Cy5                | 13               |
| Polysialic acid-neuronal cell adhesion molecule   | mouse IgM      | 1:200             | Chemicon/Millipore      | Cy5                | 22               |
| Tyrosine hydroxylase                              | mouse IgG      | 1:1,000           | R&D Systems             | Cy2, Cy3           | 21               |
| Vasoactive intestinal polypeptide (VIP)           | guinea pig     | 1:250             | DiaSorin                | Cy5                | 4                |
| Vesicular glutamate transporter 1 (VGLUT1)        | guinea pig     | 1:500             | H. Hioki                | Cy5                | 20               |

Panel of antibodies applied to study the distribution of secretagoin<sup>+</sup> neurons in the central nervous systems of mouse and gray mouse lemur. Staining methods (11, 12) and antibody specificities were described in detail elsewhere (12--27). In particular images, immunofluorescence signals were color-coded for a better identification of fine structures. Cy, carbocyanine.
